# Supplementary material
Source: ML conference proceedings conference paper supplement (https://aclanthology.org/D19-1420)
Supplement: Attachment [file D19-1420.Attachment.zip]

Archive with 3 entries (2 files):
- _EMNLP_2019_Camera_Ready_appendix.pdf
- __MACOSX/
- __MACOSX/.__EMNLP_2019_Camera_Ready_appendix.pdf
